# Supplementary material for: Quantifying hope: an EU perspective of rare disease therapeutic space and market dynamics
Source: Front Public Health. 2025 Feb 3;13:1520467. doi: 10.3389/fpubh.2025.1520467 (PMC11830808; doi:10.3389/fpubh.2025.1520467)
Supplement: Supplementary Table S6 — Landscape of rare disease therapeutics having orphan drug designation. [file Table_6.XLSX]

## Sheet: Sheet1
Bigpharma/biotech	Trade name	Active substance	Moa	Type of therapy	Disease	Market authorisation
Ablynx NV	CABLIVI	Caplacizumab	Anti von Willebrand factor (vWF) antibody	Targeted therapy	Acquired thrombotic thrombocytopenic purpura (ORPHA:93585)	30/08/2018
Advanced Accelerator Applications	LUTATHERA	Lutetium (177Lu) oxodotreotide	Somatostatin receptors type 2 inhibitor	Peptide receptor radionuclide therapy	Gastroenteropancreatic neuroendocrine tumours (ORPHA:100092)	26/09/2017
Advanced Accelerator Applications	SOMAKIT TOC	Edotreotide	SST2 inhibitor	Targeted therapy	Gastro-enteropancreatic neuroendocrine tumours	2016-08-12
Aegerion Pharmaceuticals B.V.	MYALEPTA	Metreleptin	Leptin receptor activator	Targeted therapy	Leptin deficiency (congenital generalised/ acquired generalized/ familial partial/ acquired partial) (ORPHA:66628)	29/07/2018
Akcea Therapeutics Ireland Limited	TEGSEDI	Inotersen	Transthyretin (TTR) inhibitor	Anti sense RNA therapy	Hereditary transthyretin amyloidosis	2018-10-07
Akcea Therapeutics Ireland Limited	WAYLIVRA	Volanesorsen	apoC-III inhibitor	Anti sense RNA therapy	Familial chylomicronemia syndrome (ORPHA:444490)	2019-03-05
Albireo	BYLVAY	Odevixibat	Ileal sodium/bile acid cotransporter inhibitor	Targeted therapy	Progressive familial intrahepatic cholestasis (ORPHA:172)	16/07/2021
Alexion Europe SAS	KANUMA	Sebelipase alfa	Recombinant human lysosomal acid lipase	Enzyme replacement therapy	Lysosomal acid lipase deficiency (ORPHA:275761)	28/08/2015
Alexion Europe SAS	SOLIRIS	Eculizumab	Anti C5 antibody	Targeted therapy	Atypical haemolytic uraemic syndrome/ Generalized myasthenia gravis/ Neuromyelitis optica spectrum disorder	20/06/2007
Alexion Europe SAS	STRENSIQ	Asfotase alfa	Recombinant alkaline phosphatase enzyme	Enzyme replacement therapy	Paediatric-onset hypophosphatasia (ORPHA:247667)	28/08/2015
Alnylam Netherlands B.V.	GIVLAARI	Givosiran	ALAS1 inhibitor	siRNA	Acute hepatic porphyria (ORPHA:95157)	2020-02-03
Alnylam Netherlands B.V.	ONPATTRO	Patisiran sodium	Transthyretin (TTR) inhibitor	siRNA	Hereditary transthyretin-mediated amyloidosis (hATTR amyloidosis) (ORPHA:271861)	26/08/2018
Alnylam Netherlands B.V.	OXLUMO	Lumasiran	HAO1 mRNA inhibitor	siRNA	Primary hyperoxaluria type 1 (ORPHA:93598)	19/11/2020
Amgen Europe B.V.	BLINCYTO	Blinatumomab	Anti CD19/ CD3 antibody	Targeted therapy	Acute lymphoblastic leukemia (refractory/relapsed) (ORPHA:513)	23/11/2015
Amgen Europe B.V.	KYPROLIS	Carfilzomib	Proteasome subunit beta type 1/2/5/8/9/10 inhibitor	Targeted therapy	Multiple myeloma (ORPHA:29073)	19/11/2015
Amicus Therapeutics Europe Limited	GALAFOLD	Migalastat	α-Gal A enzyme inhbitor	Targeted therapy	Fabry disease (ORPHA:324)	26/05/2016
Ammtek	AMGLIDIA	Glibenclamide	ATP-sensitive K+ channel inhibitor	Targeted therapy	Neonatal diabetes mellitus (ORPHA:224)	24/05/2018
Astellas Pharma Europe B.V.	XOSPATA	Gilteritinib fumarate	FLT3/ UFO/ ALK inhibitor	Targeted therapy	Acute myeloid leukaemia	24/10/2019
Basilea Pharmaceutica Deutschland GmbH	CRESEMBA	Isavuconazole	Lanosterol 14-alpha-demethylase inhibitor	Targeted therapy	Invasive aspergillosis/ mucormycosis	15/10/2015
Bayer AG	ADEMPAS	Riociguat	Guanylate cyclase soluble subunit alpha-2 activator	Targeted therapy	Chronic thromboembolic pulmonary hypertension (ORPHA:70591)/ Pulmonary arterial hypertension (ORPHA:182090)	27/03/2014
Bayer AG	NEXAVAR	Sorafenib tosylate	BRAF/VEGFR/FLT3/KIT/RET inhibitor	Targeted therapy	Differentiated (papillary/ follicular/Hürthle cell) thyroid carcinoma	19/07/2006
Biogen Netherlands B.V.	SPINRAZA	Nusinersen sodium	SMN activator	Anti sense RNA therapy	Spinal Muscular Atrophy	30/05/2017
BioMarin International Limited	BRINEURA	Cerliponase alfa	Recombinant tripeptidyl peptidase-1	Enzyme replacement therapy	Neuronal ceroid lipofuscinosis type 2 (ORPHA:216)	30/05/2017
BioMarin International Limited	FIRDAPSE	Amifampridine	Potassium voltage-gated channel subfamily A member 1 inhbitor	Targeted therapy	Lambert-Eaton myasthenic syndrome (ORPHA:43393)	23/12/2009
BioMarin International Limited	KUVAN	Sapropterin dihydrochloride	Phenylalanine-4-hydroxylase co factor	Targeted therapy	Hyperphenylalaninaemia/ Phenylketonuria/ Tetrahydrobiopterin (BH4) deficiency (ORPHA:1578)	2008-02-12
BioMarin International Limited	PALYNZIQ	Pegvaliase	Phenylalanine ammonia lyase (PAL) enzyme from Anabaena variabilis	Bacteria derived therapy	Phenylketonuria (ORPHA:716)	2019-03-05
BioMarin International Limited	VIMIZIM	Elosulfase alfa	Recombinant modified N-acetylgalactosamine-6-sulfatase enzyme	Enzyme replacement therapy	Mucopolysaccharidosis type IVA (ORPHA:309297)	28/04/2014
BioMarin International Limited	VOXZOGO	Vosoritide	Recombinant C-type natriuretic peptide analogue	Peptide therapy	Achondroplasia (ORPHA:15)	26/08/2021
Bioprojet Pharma	WAKIX	Pitolisant	H3 receptor inhibitor	Targeted therapy	Narcolepsy (with or without cataplexy) (ORPHA:619284)	31/03/2016
Bluebird bio (Netherlands) B.V.	SKYSONA	Elivaldogene autotemcel	AAV mediated SERPINA1 gene	Gene therapy	Early cerebral adrenoleukodystrophy	16/07/2021
Bluebird bio (Netherlands) B.V.	ZYNTEGLO	Betibeglogene autotemcel	Functional copies of the β-globin gene (βA-T87Q-globin) containing hematopoietic stem cells	Cell therapy	Transfusion-dependent β-thalassaemia	29/05/2019
Blueprint Medicines (Netherlands) B.V.	AYVAKYT	Avapritinib	KIT/PDGFR inhibitor	Targeted therapy	Gastrointestinal stromal tumours	24/09/2020
BPL Bioproducts Laboratory GmbH	COAGADEX	Human coagulation factor X	Factor X activator	Enzyme replacement therapy	Hereditary factor X deficiency	16/03/2016
Celgene Europe B.V.	IMNOVID	Pomalidomide	Protein cereblon/ Prostaglandin/ G/H synthase 2 inhibitor	Targeted therapy	Multiple myeloma (ORPHA:29073)	2013-05-08
Celgene Europe B.V.	INREBIC	Fedratinib	JAK2/ FLT3 inhibitor	Targeted therapy	Primary myelofibrosis, post polycythaemia vera myelofibrosis or post essential thrombocythaemia myelofibrosis (ORPHA:824)	2021-08-02
Celgene Europe B.V.	REBLOZYL	Luspatercept	TGF-β inhibitor	Targeted therapy	Transfusion-dependent anaemia (due to very low/ low/ intermediate-risk myelodysplastic syndromes/ associated with beta thalassaemia)	25/06/2020
Celgene Europe BV	ABECMA	Idecabtagene vicleucel	BCMA targeted CAR T cells	CAR T cell therapy	Multiple myeloma (ORPHA:29073)	18/08/2021
Chiesi Farmaceutici S.p.A.	LAMZEDE	Velmanase alfa	Recombinant human lysosomal alpha-mannosidase	Enzyme replacement therapy	Alpha mannosidosis (ORPHA:61)	23/03/2018
Chiesi Farmaceutici SpA	HOLOCLAR	Ex vivo expanded autologous human corneal epithelial cells containing stem cells		Cell therapy	Limbal stem cell deficiency (ORPHA:171673)	17/02/2015
Chiesi Farmaceutici SpA	PROCYSBI	Mercaptamine	Cystine inhibitor	Targeted therapy	Nephropathic cystinosis	2013-06-09
Clinuvel Europe Limited	SCENESSE	Afamelanotide	MC1R activator, α-melanocyte stimulating hormone analog	Targeted therapy	Erythropoietic protoporphyria (ORPHA:79278)	22/12/2014
CSL Behring GmbH	IDELVION	Albutrepenonacog alfa	Coagulation factor X activator	Enzyme replacement therapy	Haemophilia B (congenital factor IX deficiency) (ORPHA:98879)	2016-11-05
Dompe farmaceutici s.p.a.	OXERVATE	Cenegermin	Recombinant human nerve growth factor	Enzyme replacement therapy	Neurotrophic keratitis (ORPHA:137596)	2017-06-07
Dr. Falk Pharma GmbH	JORVEZA	Budesonide	Glucocorticoid receptor activator	Targeted therapy	Eosinophilic esophagitis	2018-08-01
Eurocept International B.V.	GRANUPAS	Para-aminosali- cylic acid	Folate synthesis inhibitor	Targeted therapy	Multi-drug resistant tuberculosis	2014-07-04
EUSA Pharma (Netherlands) B.V	SYLVANT	Siltuximab	Anti IL-6 antibody	Targeted therapy	Multicentric Castleman’s disease (patients with HIV/ HHV-8 negative)	22/05/2014
EUSA Pharma (Netherlands) B.V.	QARZIBA	Dinutuximab beta	Anti GD2 antibody	Targeted therapy	Neuroblastoma (ORPHA:635)	2017-08-05
FGK Representative Service GmbH	PRETOMANID FGKDOVPRELA	Pretomanid	Mycolic acid biosynthesis inhibitor	Targeted therapy	Tuberculosis (pulmonary extensively drug resistant/ treatment-intolerant/ nonresponsive multidrug-resistant) (ORPHA:3389)	31/07/2020
Gentium SRL	DEFITELIO	Defibrotide	PAI-1/vWF inhibitor	Targeted therapy	Severe hepatic veno-occlusive disease	18/10/2013
Genzyme Europe B.V.	CERDELGA	Eliglustat	Glucosylceramide synthase inhibitor	Targeted therapy	Gaucher disease type 1 (ORPHA:355)	19/01/2015
Genzyme Europe B.V.	MOZOBIL	Plerixafor	CXCR4 inhibitor	Targeted therapy	Lymphoma/ Multiple myeloma (ORPHA:29073)	31/07/2009
GlaxoSmithKline (Ireland) Limited	BLENREP	Belantamab mafodotin	Anti BCMA antibody, monomethyl auristatin E (MMAE)	Targeted therapy	Multiple myeloma (ORPHA:29073)	25/08/2020
GW Pharma (International) B.V.	EPIDYOLEX	Cannabidiol	GPR55 activator	Targeted therapy	Lennox Gastaut syndrome/ Dravet syndrome (ORPHA:33069)	19/09/2019
Hansa Biopharma AB	IDEFIRIX	Imlifidase	Human IgG antibodies inhibitor	Targeted therapy	Highly sensitised adult kidney transplant	25/08/2020
HRA Pharma Rare Diseases	KETOCONAZOLE HRA	Ketoconazole	Cytochrome P-450 dependent enzyme lanosterol 14α-demethylase inhibitor	Targeted therapy	Endogenous Cushing’s syndrome	19/11/2014
Immedica Pharma AB	RAVICTI	Glycerol phenylbutyrate	Nitrogen binder	Targeted therapy	Urea cycle disorders (deficiencies of carbamoyl phosphate-synthase-I)	27/11/2015
Incyte Biosciences Distribution B.V.	ICLUSIG	Ponatinib	Bcr-Abl tyrosine kinase inhibitor	Targeted therapy	Chronic myeloid leukaemia/ Philadelphia chromosome positive acute lymphoblastic leukaemia	2013-01-07
Incyte Biosciences Distribution B.V.	MINJUVI	Tafasitamab	Anti CD19 antibody	Targeted therapy	Diffuse large B-cell lymphoma (who are not eligble for autologous stem cell transplant) (ORPHA:544)	26/08/2021
Incyte Biosciences Distribution B.V.	PEMAZYRE	Pemigatinib	FGFR1/ FGFR2/ FGFR3 inhibitor	Targeted therapy	Cholangiocarcinoma (ORPHA:70567)	26/03/2021
Insmed Netherlands B.V.	ARIKAYCE LIPOSOMAL	Amikacin	30S ribosomal protein S12 inhibitor	Targeted therapy	Non-tuberculous mycobacterial lung infections caused by Mycobacterium avium Complex	27/10/2020
Intercept Pharma International Ltd	OCALIVA	Obeticholic acid	FXR activator	Targeted therapy	Primary biliary cholangitis (ORPHA:186)	2016-12-12
IPSEN Pharma	COMETRIQ	Cabozantinib	AXL/MET/VEGFR inhibitor	Targeted therapy	Medullary thyroid carcinoma (ORPHA:1332)	21/03/2014
Ipsen Pharma	XERMELO	Telotristat	Tryptophan hydroxylase inhibitor	Targeted therapy	Carcinoid syndrome (ORPHA:100093)	18/09/2017
Janssen-Cilag International N.V.	DACOGEN	Decitabine	DNA (cytosine-5)-methyltransferase 1 (DNMT1) inhibitor	Targeted therapy	Acute myeloid leukaemia (ORPHA:86845)	20/09/2012
Janssen-Cilag International N.V.	DARZALEX	Daratumumab	Anti CD38 antibody	Targeted therapy	Multiple myeloma (ORPHA:29073)	20/05/2016
Janssen-Cilag International N.V.	IMBRUVICA	Ibrutinib	BTK inhibitor	Targeted therapy	Mantle cell lymphoma/ Chronic myeloid leukaemia/ Waldenström’s macroglobulinaemia (ORPHA:52416)	21/10/2014
Janssen-Cilag International N.V.	OPSUMIT	Macitentan	ET-1 inhibitor	Targeted therapy	Pulmonary arterial hypertension (ORPHA:182090)	20/12/2013
Janssen-Cilag International N.V.	SIRTURO	Bedaquiline	ATP synthase subunit c inhibitor	Targeted therapy	Pulmonary multidrug-resistant tuberculosis	2014-05-03
Jazz Pharmaceuticals Ireland Limited	VYXEOS	Daunorubicin hydrochloride/ cytarabine	DNA topoisomerase 2-alpha/ DNA topoisomerase 2-beta inhibitor/ DNA polymerase beta inhibitor	Combination therapy	Acute myeloid leukaemia/ AML with myelodysplasia-related changes	22/08/2018
Kite Pharma EU B.V.	TECARTUS	Brexucabtagene autoleucel	Anti CD19 antibody	Targeted therapy	Mantle cell lymphoma (ORPHA:52416)	14/12/2020
Kite Pharma EU B.V.	YESCARTA	Axicabtagene ciloleucel	CD19 directed CAR T cell	CAR T cell therapy	Diffuse large B-cell lymphoma/ Primary mediastinal large B-cell lymphoma	22/08/2018
Kyowa Kirin Holdings B.V.	CRYSVITA	Burosumab	Anti FGF23 antibody	Targeted therapy	X-linked hypophosphataemia	19/02/2018
Kyowa Kirin Holdings B.V.	POTELIGEO	Mogamulizumab	Anti CCR4 antibody	Targeted therapy	Mycosis fungoides/ Sézary syndrome (ORPHA:2584/ ORPHA:3162)	22/11/2018
Laboratoires CTRS	ORPHACOL	Cholic acid	FXR activator	Targeted therapy	Inborn errors in primary bile acid synthesis (due to 3beta-hydroxy-delta5-C27- steroid oxidoreductase deficiency or delta4-3- oxosteroid-5beta-reductase deficiency	2013-12-09
Leadiant GmbH	CHENODEOXYCHOLI C ACID LEADIANT	Chenodeoxycholic acid	FXR modulator	Targeted therapy	Inborn errors of primary bile acid synthesis due to sterol 27 hydroxylase deficiency	2017-10-04
Les Laboratoires Servier	ONIVYDE	Irinotecan hydrochloride trihydrate	DNA topoisomerase I (mitochondrial)/ DNA topoisomerase 1 inhibitor	Targeted therapy	Adenocarcinoma of the pancreas (ORPHA:424073)	14/10/2016
Lupin Europe GmbH	NAMUSCLA	Mexiletine hcl	Sodium channel protein type 5 subunit alpha inhibitor	Targeted therapy	Non-dystrophic myotonic disorders	18/12/2018
Medac Gesellschaft für klinische Spezialpräparate mbH	TRECONDI	Treosulfan	DNA alkylating agent	Chemotherapy	Conditioning treatment prior to allogeneic haematopoietic stem cell transplantation (in adult patients with malignant and non-malignant diseases/ in paediatric patients older than one month with malignant diseases)	20/06/2019
Mediwound Germany Gmbh	NEXOBRID	Concentrate of proteolytic enzymes enriched in bromelain			Deep partial- and full-thickness thermal burns	18/12/2012
Merck Sharp & Dohme B.V.	PREVYMIS	Letermovir	CMV DNA Terminase Complex inhibitor	Targeted therapy	Cytomegalovirus (reactivation and disease)	2018-08-01
Mylan IRE Healthcare Limited	TOBI PODHALER	Tobramycin	16S rRNA/ 23S rRNA inhibitor	Antibiotic	Cystic fibrosis (ORPHA:586)	20/07/2011
MYR GmbH	HEPCLUDEX	Bulevirtide	Sodium/bile acid cotransporter inhibitor	Targeted therapy	Chronic hepatitis delta virus infection	31/07/2020
Nova Laboratories Ireland Limited	XALUPRINE	Mercaptopurine	Hypoxanthine-guanine phosphoribosyltransferase inhibitor, purine analog	Targeted therapy	Acute lymphoblastic leukaemia (ORPHA:513)	2012-09-03
Novartis Europharm Limited	ADAKVEO	Crizanlizumab	Anti P-selectin antibody	Targeted therapy	Sickle cell disease (ORPHA:232)	28/10/2020
Novartis Europharm Limited	ISTURISA	Osilodrostat	Mitochodrial cytochrome P450 11B1 inhibitor	Targeted therapy	Endogenous Cushing’s syndrome	13/01/2020
Novartis Europharm Limited	KYMRIAH	Tisagenlecleucel	CD19 targeted CAR T cells	CAR T cell therapy	B-cell acute lymphoblastic leukaemia/ Diffuse large B-cell lymphoma (ORPHA:544)	22/08/2018
Novartis Europharm Limited	LUXTURNA	Voretigene neparvovec	AAVV mediated RPE65 gene transfer	Gene therapy	Inherited retinal dystrophy (ORPHA:71862)	22/11/2018
Novartis Europharm Limited	RYDAPT	Midostaurin	Protein kinase C alpha (PKCalpha)/ VEGFR2/ KIT/ PDGFR/ FLT3 inhibitor	Targeted therapy	Acute myeloid leukaemia/ aggressive systemic mastocytosis/ systemic mastocytosis with associated haematological neoplasm/ mast cell leukaemia (ORPHA:86845)	18/09/2017
Novartis Europharm Ltd	SIGNIFOR	Pasireotide	Somatostatin receptor type 1/2/3 activator	Targeted therapy	Cushing’s disease/ Acromegaly (ORPHA:963)	24/04/2012
Novartis Europharm Ltd	VOTUBIA	Everolimus	mTORC1 inhibitor	Targeted therapy	Renal angiomyolipoma associated with tuberous sclerosis complex/ Subependymal giant cell astrocytoma (ORPHA:805, ORPHA:251618)	2011-02-09
Novartis Gene Therapies EU Limited	ZOLGENSMA	Onasemnogene abeparvovec	AAV9 mediated SMN gene	Gene therapy	Spinal Muscular Atrophy	18/05/2020
Novo Nordisk A/S	SOGROYA	Somapacitan	IGFR activator	Targeted therapy	Growth hormone deficiency	31/03/2021
Orchard Therapeutics (Netherlands) B.V.	STRIMVELIS	Autologous CD34+ enriched cell fraction that contains CD34+ cells transduced with retroviral vector that encodes for the human adenosine deaminase (ADA) cDNA sequence from human haematopoietic stem/progenitor (CD34+) cells		Cell therapy	Severe combined immunodeficiency (due to adenosine deaminase deficiency) (ORPHA:277)	26/05/2016
Orchard Therapeutics (Netherlands) BV	LIBMELDY	Atidarsagene autotemcel (Autologous CD34+ cells encoding ARSA) gene	LV mediated ARSA modified gene transfer	Gene therapy	Metachromatic leukodystrophy (characterized by biallelic mutations in the arylsulfatase A) (ORPHA:512)	17/12/2020
Otsuka Novel Products GmbH	DELTYBA	Delamanib	Methoxy-mycolic and keto-mycolic acid synthesis inhibitor	Targeted therapy	Pulmonary multi-drug resistant tuberculosis	28/04/2014
Pfizer Europe MA EEIG	BESPONSA	Inotuzumab ozogamicin	Anti CD22 antibody, N-acetyl-gamma-calicheamicin dimethylhydrazide	Targeted therapy	Acute lymphoblastic leukemia (ORPHA:513)	29/06/2017
Pfizer Europe MA EEIG	DAURISMO	Glasdegib	SMO inhibitor	Targeted therapy	Acute myeloid leukaemia (ORPHA:86845)	26/06/2020
Pfizer Europe MA EEIG	MYLOTARG	Gemtuzumab ozogamicin	Anti CD33 antibody, calicheamicin	Targeted therapy	Acute myeloid leukaemia	19/04/2018
Pfizer Europe MA EEIG	VYNDAQEL	Tafamidis	Transthyretin (TTR) inhibitor	Targeted therapy	Transthyretin amyloidosis (ORPHA:69)	16/11/2011
Pharmaxis Europe Limited	BRONCHITOL	Mannitol	Osmotic diuretic	Polyol	Cystic fibrosis (ORPHA:586)	13/04/2012
PTC Therapeutics International Ltd	TRANSLARNA	Ataluren	Ribosomal readthrough activator, nonsense-suppressing agent	Targeted therapy	Duchenne muscular dystrophy (ORPHA:98896)	31/07/2014
Recordati Rare Diseases	CARBAGLU	Carglumic acid	Mitochondrial carbamoyl-phosphate synthase modulator	Targeted therapy	Hyperammonaemia due to isovaleric acidaemia/ methymalonic acidaemia/ propionic acidaemia	2011-01-06
Recordati Rare Diseases	CYSTADROPS	Mercaptamine hydrochloride	Cystine inhibitor	Targeted therapy	Cystinosis (ORPHA:213)	19/01/2017
Rhythm Pharmaceuticals Limited	IMCIVREE	Setmelanotide	MC4R activator	Targeted therapy	Obesity and the control of hunger associated with genetically confirmed loss-of-function biallelic pro-opiomelanocortin (POMC), including PCSK1, deficiency or biallelic leptin receptor (LEPR) deficiency	16/07/2021
Roche Registration GmbH	ENSPRYNG	Satralizumab	Anti IL-6 antibody	Targeted therapy	Neuromyelitis optica spectrum disorder (ORPHA:71211)	24/06/2021
Roche Registration GmbH	EVRYSDI	Risdiplam	Survival of motor neuron 2 (SMN2) pre-mRNA splicing modifier	Targeted therapy	Spinal muscular atrophy	26/03/2021
Roche Registration GmbH	ESBRIET	Pirfenidone	TGF-β inhibitor	Targeted therapy	Idiopathic Pulmonary Fibrosis (ORPHA:2032)	28/02/2011
Roche Registration GmbH	GAZYVARO	Obinutuzumab	Anti CD20 antibody	Targeted therapy	Chronic lymphocytic leukaemia/ Follicular lymphoma (ORPHA:545)	23/07/2014
Roche Registration GmbH	POLIVY	Polatuzumab vedotin	Anti CD79b antibody	Targeted therapy	Diffuse large B-cell lymphoma (ORPHA:544)	20/01/2020
Santen Oy	VERKAZIA	Ciclosporin	Calcineurin subunit B type 2 inhibitor	Targeted therapy	Vernal keratoconjunctivitis (ORPHA:70476)	2018-06-07
Santhera Pharmaceuticals (Deutschland) GmbH	RAXONE	Idebenone	Synthetic ubiquinine, ATP production enhancer	Targeted therapy	Leber’s Hereditary Optic Neuropathy	2015-08-09
SciPharm Sàrl	TREPULMIX	Treprostinil	Prostaglandin D2 receptor activator	Targeted therapy	Thromboembolic pulmonary hypertension (ORPHA:71198)	2020-03-04
Secura Bio Limited	FARYDAK	Panobinostat lactate anhydrous	HDAC inhibitor	Targeted therapy	Multiple myeloma (ORPHA:29073)	28/08/2015
SFL Pharmaceuticals Deutschland GmbH	OBILTOXAXIMAB SFL	Obiltoxaximab	Anti PA (B. anthracis toxin) antibody	Targeted therapy	Inhalational anthrax due to Bacillus anthracis	18/11/2020
Shire Pharmaceuticals Ireland Limited	FIRAZYR	Icatibant acetate	B2 receptor inhibitor	Targeted therapy	Hereditary angioedema (ORPHA:91378)	2008-11-07
Shire Pharmaceuticals Ireland Limited	REVESTIVE	Teduglutide	GLP-2 activator	Targeted therapy	Short Bowel Syndrome (ORPHA:104008)	30/08/2012
Shire Pharmaceuticals Ireland Limited	TAKHZYRO	Lanadelumab	Anti plasma kallikrein antibody	Targeted therapy	Hereditary angioedema (ORPHA:91378)	22/11/2018
Shire Pharmaceuticals Ireland Ltd	NATPAR	Parathyroid hormone	Parathyroid hormone 2 receptor activator	Targeted therapy	Hypoparathyroidism	24/04/2017
Shire Pharmaceuticals Ireland Ltd	VPRIV	Velaglucerase alfa	Recombinant human glucocerebrosidase	Enzyme replacement therapy	Type 1 Gaucher disease	26/08/2010
Shire Services BVBA	PLENADREN	Hydrocortisone	Glucocorticoid receptor/ Annexin A1 activator	Targeted therapy	Adrenal insufficiency (ORPHA:95409)	2011-03-11
Stemline Therapeutics B.V.	ELZONRIS	Tagraxofusp	Diphtheria toxin-interleukin-3 (IL-3) fusion protein	Targeted therapy	Blastic plasmacytoid dendritic cell neoplasm (ORPHA:86870)	2021-07-01
Swedish Orphan Biovitrum AB (publ)	ALPROLIX	Eftrenonacog alfa	Recombinant Factor IX	Enzyme replacement therapy	Haemophilia B (ORPHA:98879)	2016-12-05
Takeda Pharma A/S	ADCETRIS	Brentuximab vedotin	Anti CD30 antibody, monomethyl auristatin E (MMAE)	Targeted therapy	Hodgkin/Large cell/T-cell lymphoma (ORPHA:391)	25/10/2012
Takeda Pharma A/S	ALOFISEL	Darvadstrocel	Human allogeneic adipose-derived mesenchymal stem cells	Cell therapy	Non-active/mildly active luminal Crohn's disease (ORPHA:206)	23/03/2018
Takeda Pharma A/S	NINLARO	Ixazomib	CT-L proteolytic (β5) of 20S proteosome inhibitor	Targeted therapy	Multiple myeloma (ORPHA:29073)	21/11/2016
TESARO Bio Netherlands B.V.	ZEJULA	Niraparib	PARP 1/2 inhibitor	Targeted therapy	Serous epithelial ovarian fallopian tube/ Primary peritoneal cancer	16/11/2017
Ultragenyx Germany GmbH	MEPSEVII	Vestronidase alfa	Recombinant human lysosomal beta glucuronidase	Enzyme replacement therapy	Mucopolysaccharidosis VII (ORPHA:584)	22/08/2018
Vanda Pharmaceuticals Germany GmbH	HETLIOZ	Tasimelteon	MT1/ MT2 activator	Targeted therapy	Non-24-Hour Sleep-Wake Disorder (for blind patients)	2015-03-07
Vertex Pharmaceuticals (Ireland) Limited	KAFTRIO	Ivacaftor / tezacaftor / elexacaftor	CFTR activator	Combination therapy	Cystic fibrosis (ORPHA:586)	21/08/2020
Vertex Pharmaceuticals (Ireland) Limited	KALYDECO	Ivacaftor	CFTR activator	Targeted therapy	Cystic fibrosis (ORPHA:586)	23/07/2012
Vertex Pharmaceuticals (Ireland) Limited	SYMKEVI	Tezacaftor/ Ivacaftor	CFTR activator	Combination therapy	Cystic fibrosis (ORPHA:586)	31/10/2018
Zogenix ROI Limited	FINTEPLA	Fenfluramine	5-HT2 receptor agonist, σ1 receptor inhbiitor	Targeted therapy	Dravet syndrome (ORPHA:33069)	18/12/2020
